# Supplementary material for: Targeting myeloid-derived suppressor cells in combination with primary mammary tumor resection reduces metastatic growth in the lungs
Source: PubMed Central journal article supplement (PMC6727565; doi:10.1186/s13058-019-1189-x), 2019-09-05
Supplement: 13058_2019_1189_MOESM1_ESM.pdf [file 13058_2019_1189_MOESM1_ESM.pdf]

# Supplemental Table 1

| SUBSET                         | MARKERS                                                                                                                                                   | SUBSET                           | MARKERS                                                                                                       | SUBSET                                                | MARKERS                                                                                                                                              | SUBSET          | MARKERS                                 |
|--------------------------------|-----------------------------------------------------------------------------------------------------------------------------------------------------------|----------------------------------|---------------------------------------------------------------------------------------------------------------|-------------------------------------------------------|------------------------------------------------------------------------------------------------------------------------------------------------------|-----------------|-----------------------------------------|
| <b>G-MDSC/<br/>Neutrophils</b> | NK1.1 <sup>-</sup><br>CD19 <sup>-</sup><br>CD11b <sup>+</sup><br>SiglecF <sup>-</sup><br>Ly6G <sup>+</sup>                                                | <b>Alveolar MΦ</b>               | NK1.1 <sup>-</sup><br>CD19 <sup>-</sup><br>CD11b <sup>-</sup><br>SiglecF <sup>+</sup>                         | <b>CD8<sup>+</sup> T<br/>cells</b>                    | NK1.1 <sup>-</sup><br>CD19 <sup>-</sup><br>CD11b <sup>-</sup><br>SiglecF <sup>-</sup><br>CD11c <sup>-</sup><br>CD8 <sup>+</sup>                      | <b>B cells</b>  | CD19 <sup>+</sup><br>NK1.1 <sup>-</sup> |
| <b>M-MDSC/<br/>Monocytes</b>   | NK1.1 <sup>-</sup><br>CD19 <sup>-</sup><br>CD11b <sup>+</sup><br>SiglecF <sup>-</sup><br>Ly6G <sup>-</sup><br>Ly6C <sup>-/mid</sup><br>MHCII <sup>-</sup> | <b>Eosinophils</b>               | NK1.1 <sup>-</sup><br>CD19 <sup>-</sup><br>CD11b <sup>+</sup><br>SiglecF <sup>+</sup>                         | <b>CD4<sup>+</sup><br/>T<sub>conv</sub><br/>cells</b> | NK1.1 <sup>-</sup><br>CD19 <sup>-</sup><br>CD11b <sup>-</sup><br>SiglecF <sup>-</sup><br>CD11c <sup>-</sup><br>CD4 <sup>+</sup><br>CD25 <sup>-</sup> | <b>NK cells</b> | NK1.1 <sup>+</sup><br>CD19 <sup>-</sup> |
| <b>Macrophages<br/>(MΦ)</b>    | NK1.1 <sup>-</sup><br>CD19 <sup>-</sup><br>CD11b <sup>+</sup><br>SiglecF <sup>-</sup><br>Ly6G <sup>-</sup><br>Ly6C <sup>+</sup>                           | <b>Dendritic<br/>cells (DCs)</b> | NK1.1 <sup>-</sup><br>CD19 <sup>-</sup><br>SiglecF <sup>-</sup><br>CD11c <sup>+</sup><br>MHCII <sup>-/+</sup> | <b>T<sub>regs</sub></b>                               | NK1.1 <sup>-</sup><br>CD19 <sup>-</sup><br>CD11b <sup>-</sup><br>SiglecF <sup>-</sup><br>CD11c <sup>-</sup><br>CD4 <sup>+</sup><br>CD25 <sup>+</sup> |                 |                                         |

Supplemental Table 1: Cell surface markers used to identify immune cell populations for CyTOF analysis in figure 1A and supplemental figure 1A.
