# Supplementary material for: Targeting myeloid-derived suppressor cells in combination with primary mammary tumor resection reduces metastatic growth in the lungs
Source: PubMed Central journal article supplement (PMC6727565; doi:10.1186/s13058-019-1189-x), 2019-09-05
Supplement: 13058_2019_1189_MOESM2_ESM.pdf [file 13058_2019_1189_MOESM2_ESM.pdf]

# Supplemental Figure 1

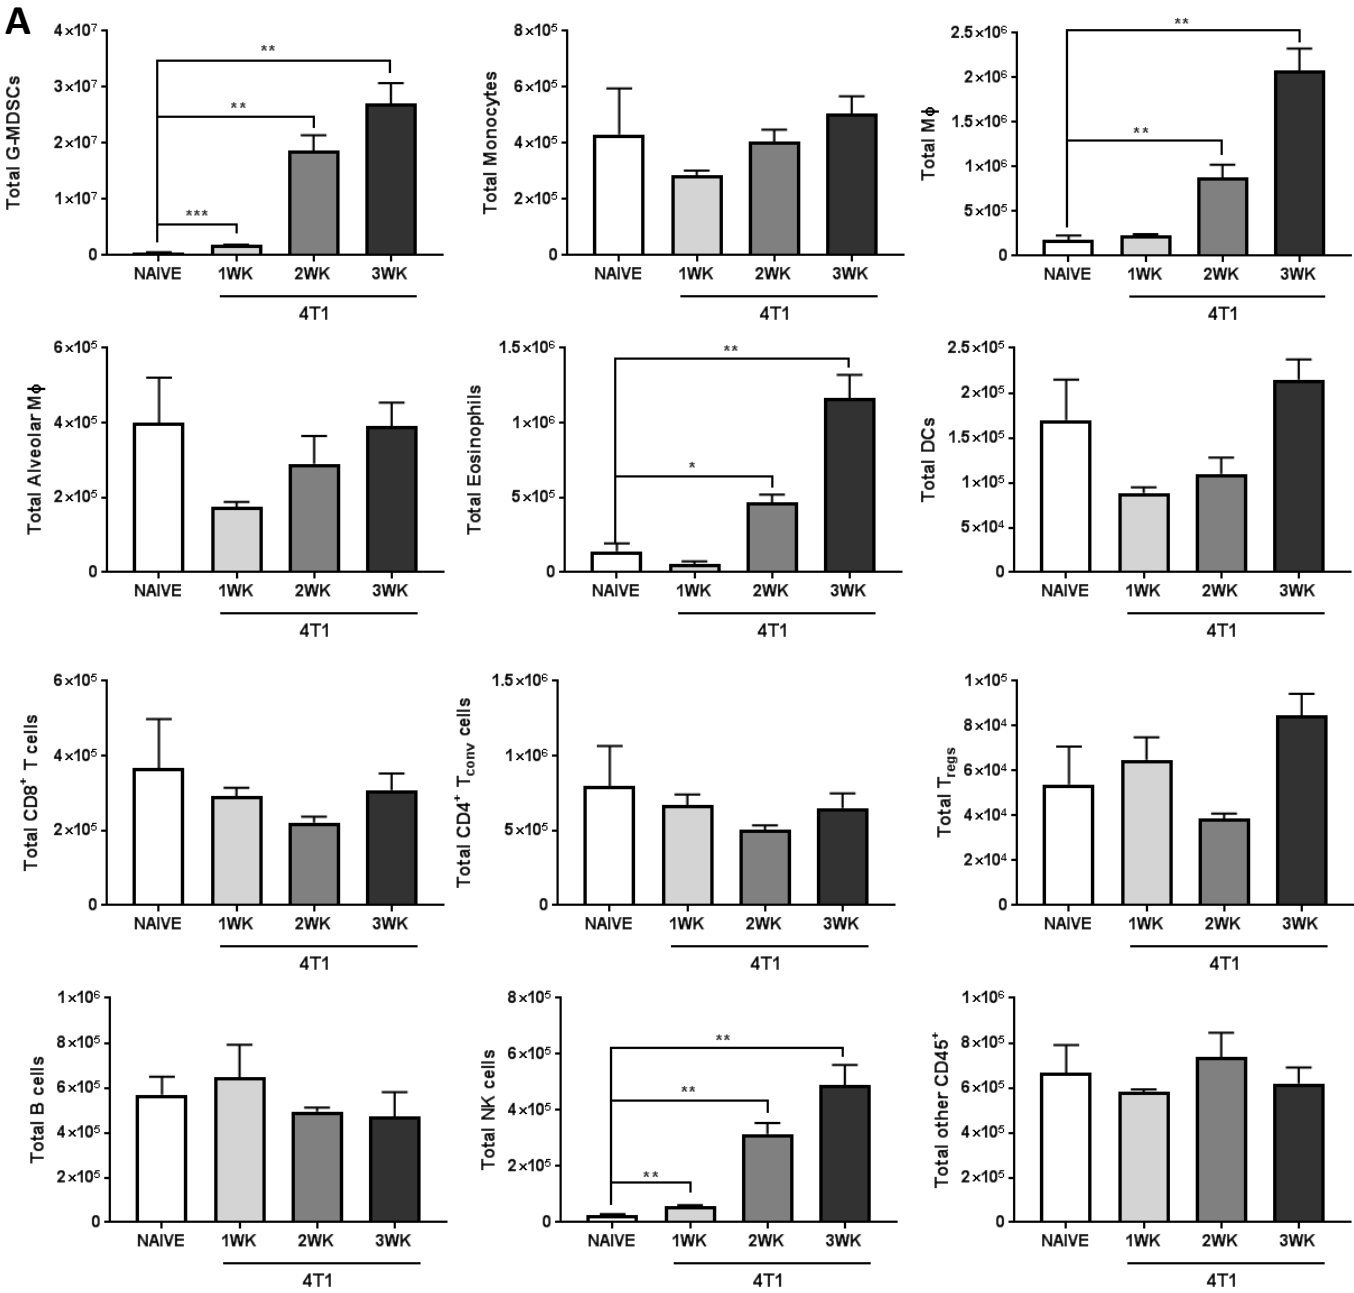

Supplemental Figure 1: **A**) Quantification of lung-infiltrating leukocyte populations by CyTOF analysis in naïve mice and mice implanted with 4T1 orthotopic mammary tumors 1 week, 2 weeks, and 3 weeks post-implant. Data are mean ± SEM with n=3 mice per group; \*p<0.05; \*\*p<0.01; \*\*\*p<0.001.
