# Supplementary material for: Targeting myeloid-derived suppressor cells in combination with primary mammary tumor resection reduces metastatic growth in the lungs
Source: PubMed Central journal article supplement (PMC6727565; doi:10.1186/s13058-019-1189-x), 2019-09-05
Supplement: 13058_2019_1189_MOESM3_ESM.pdf [file 13058_2019_1189_MOESM3_ESM.pdf]

# Supplemental Figure 2

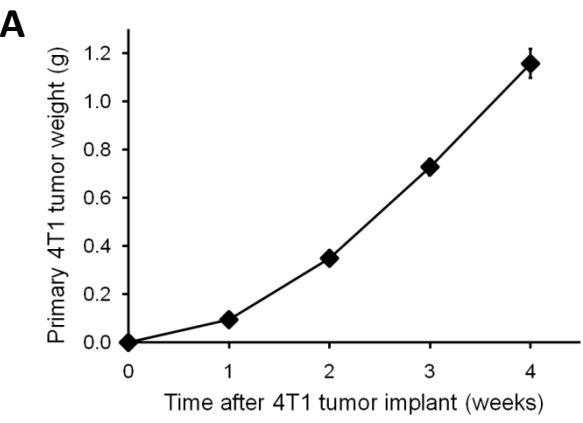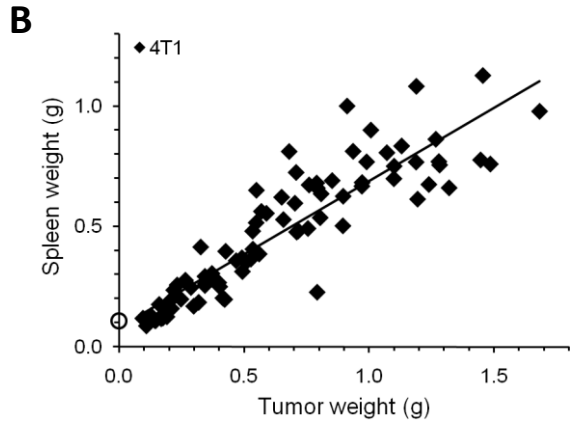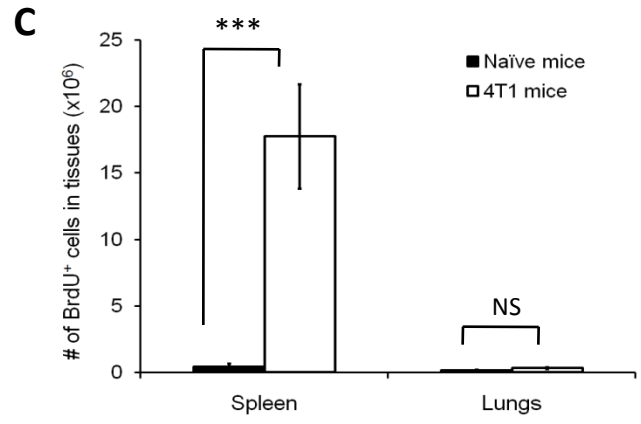

Supplemental Figure 2: **A)** Growth of 4T1 primary tumors after orthotopic implantation of 4T1 tumor cells. Data are mean  $\pm$  sem with n=15-21 tumors per data point. **B)** Tumor weight vs spleen weight for individual 4T1 tumor-bearing mice. Open circle is spleen weight of n=6 naive mice **C)** Bromodeoxyuridine (BrdU) labeled S phase cells in spleen and lungs of naive mice or mice 3 weeks after 4T1 tumour implantation. Data are mean  $\pm$  sem with n=4 tumors per group; \*\*\*p<0.001
