# Supplementary material for: Targeting myeloid-derived suppressor cells in combination with primary mammary tumor resection reduces metastatic growth in the lungs
Source: PubMed Central journal article supplement (PMC6727565; doi:10.1186/s13058-019-1189-x), 2019-09-05
Supplement: 13058_2019_1189_MOESM6_ESM.pdf [file 13058_2019_1189_MOESM6_ESM.pdf]

# Supplemental Figure 5

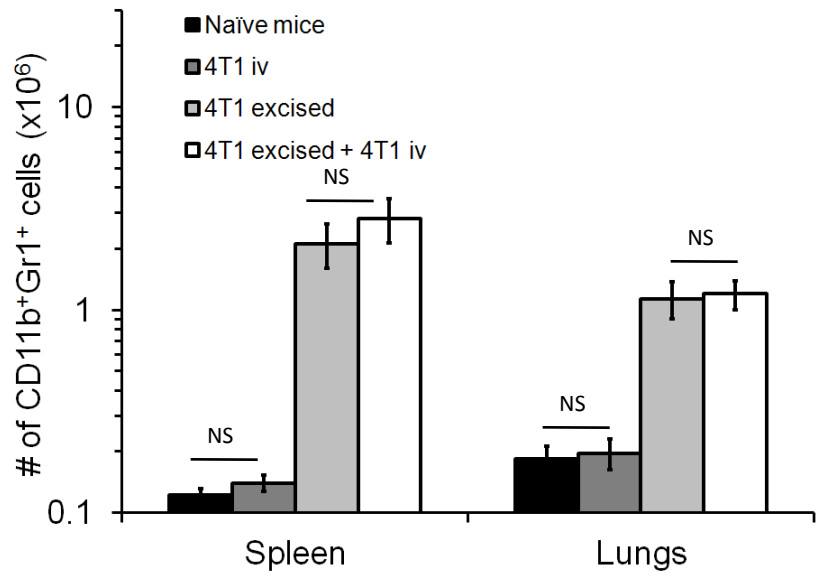

Supplemental Figure 6: Intravenous injection of 12,000 4T1 tumor cells does not affect the number of CD11b+Gr1+ cells in the spleen or lungs of naïve mice or mice after 4T1 primary tumour resection.
