# Supplementary material for: Targeting myeloid-derived suppressor cells in combination with primary mammary tumor resection reduces metastatic growth in the lungs
Source: PubMed Central journal article supplement (PMC6727565; doi:10.1186/s13058-019-1189-x), 2019-09-05
Supplement: 13058_2019_1189_MOESM7_ESM.pdf [file 13058_2019_1189_MOESM7_ESM.pdf]

# Supplemental Figure 6

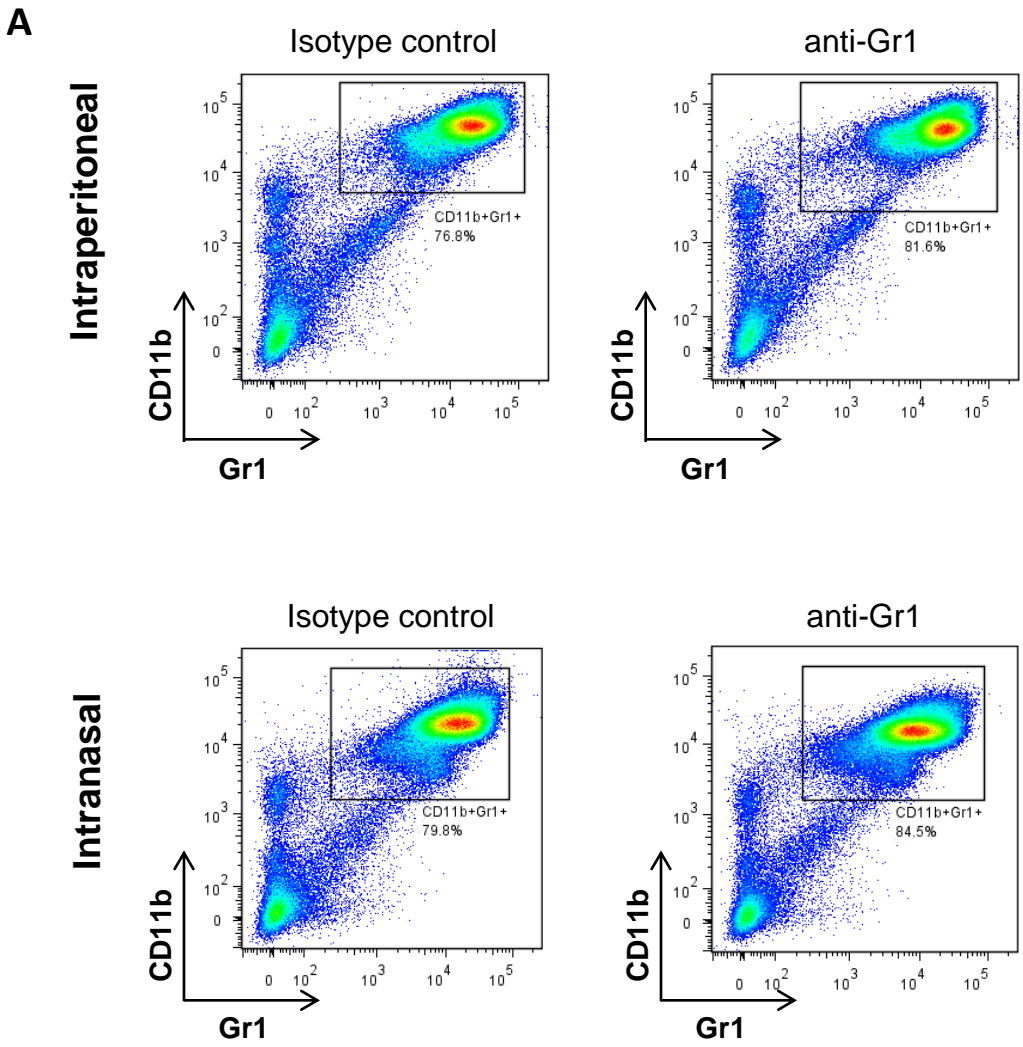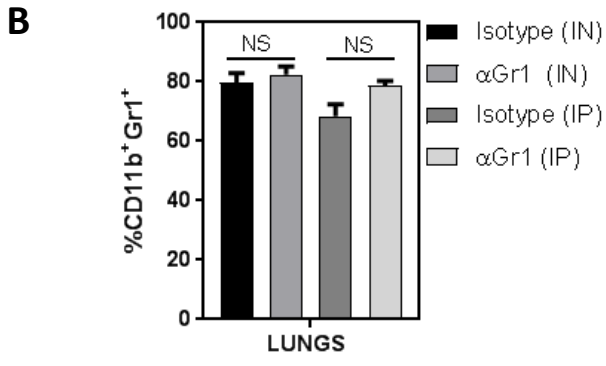

Supplemental Figure 7: Treatment of 4T1-tumour-bearing mice treated with anti-Gr1 antibody did not deplete lung CD11b+Gr1+ cells. **A)** Representative flow plots of %CD11b+Gr1+ cells in the lungs of 4T1-tumor bearing mice treated with 100ug anti-Gr1 antibody or isotype control (intraperitoneal injection or intranasally) every 4 days until tissue harvest on day 21. **B)** Quantification of %CD11b+Gr1+ cells in the lungs of 4T1-tumor bearing mice treated with 100ug anti-Gr1 antibody or isotype control. n=6 mice per group.
