# Supplementary material for: Targeting myeloid-derived suppressor cells in combination with primary mammary tumor resection reduces metastatic growth in the lungs
Source: PubMed Central journal article supplement (PMC6727565; doi:10.1186/s13058-019-1189-x), 2019-09-05
Supplement: 13058_2019_1189_MOESM8_ESM.pdf [file 13058_2019_1189_MOESM8_ESM.pdf]

# Supplemental Figure 7

**A**

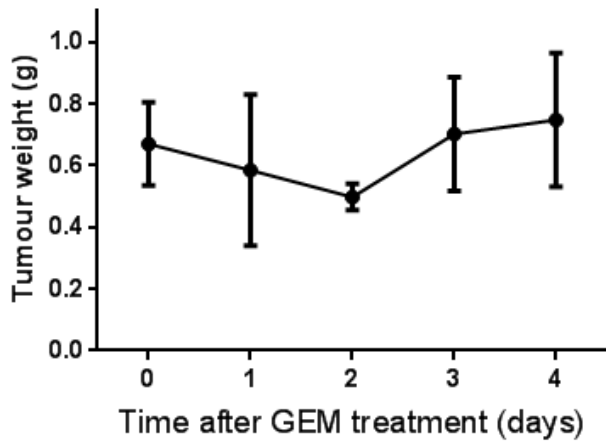

**B**

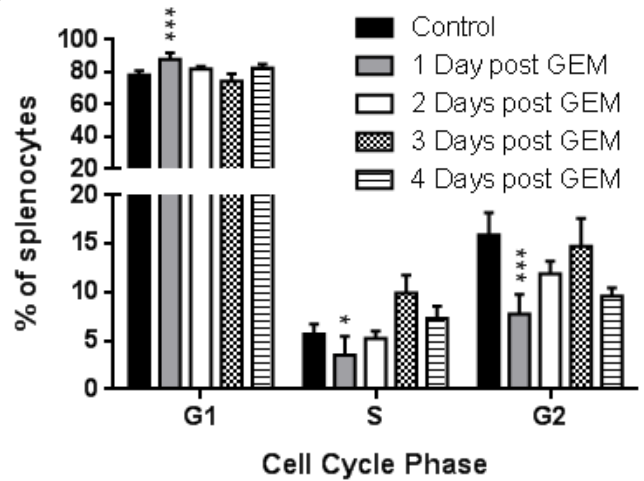

**C**

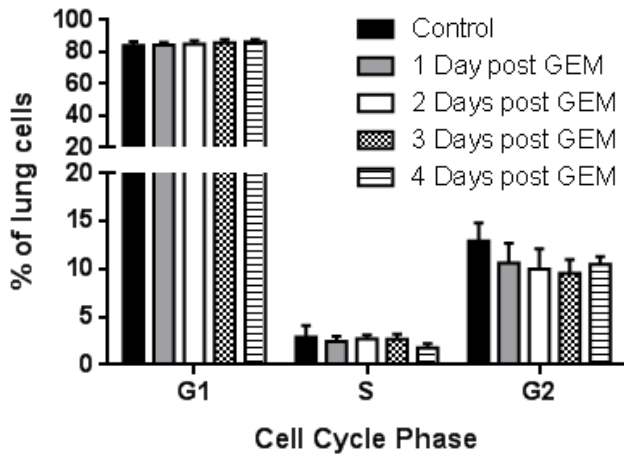

Supplemental Figure 8: **A**) 4T1 tumour weights after single injection of 60mg/kg gemcitabine administered 17 days after primary tumour implant. **B**) Flow cytometry analysis of G1, S, and G2/M phase cells in the spleen from mice in (A). **C**) Flow cytometry analysis of G1, S, and G2/M phase cells in the lungs from mice in (A).
