# Supplementary material for: Targeting myeloid-derived suppressor cells in combination with primary mammary tumor resection reduces metastatic growth in the lungs
Source: PubMed Central journal article supplement (PMC6727565; doi:10.1186/s13058-019-1189-x), 2019-09-05
Supplement: 13058_2019_1189_MOESM9_ESM.pdf [file 13058_2019_1189_MOESM9_ESM.pdf]

# Supplemental Figure 8

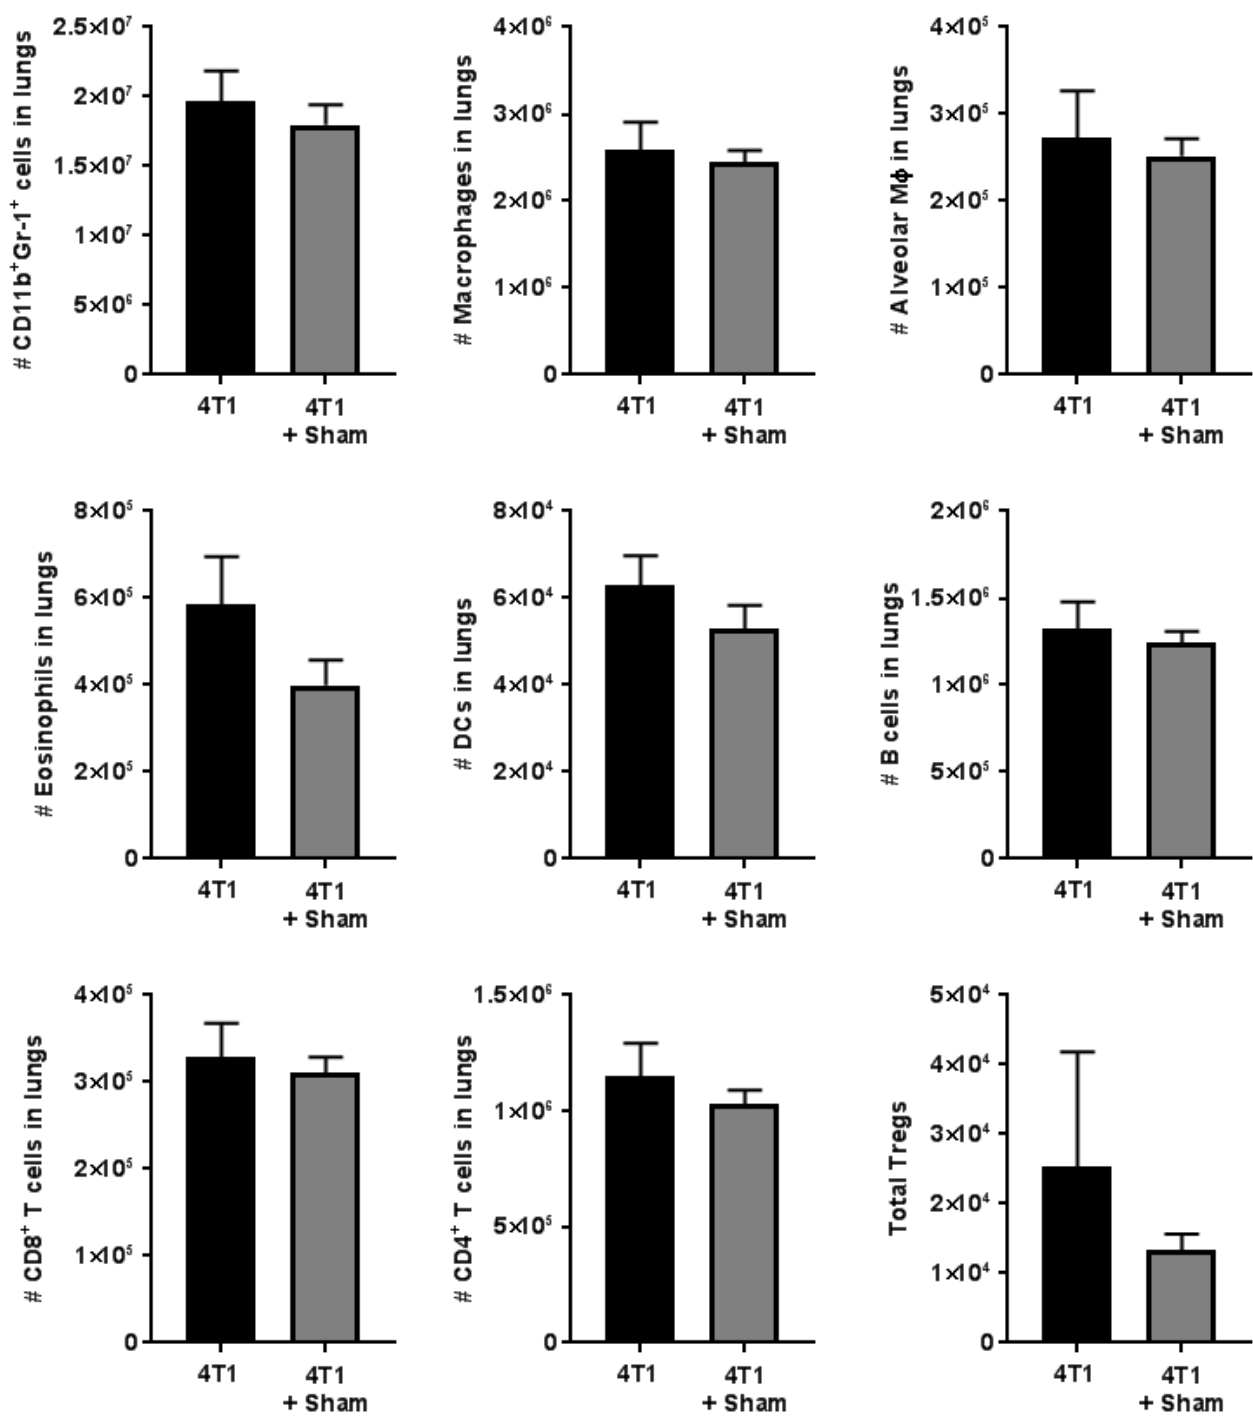

Supplemental Figure 9: **A**) Total number of CD11b<sup>+</sup>Gr-1<sup>+</sup>, macrophages, alveolar macrophages, eosinophils, dendritic cells (DCs), B cells, CD8<sup>+</sup> T cells, CD4<sup>+</sup> T cells, and T regulatory cells the lungs of 4T1 tumor-bearing mice and 4T1 tumor-bearing mice who underwent a sham surgery.
