# Supplementary material for: Targeting myeloid-derived suppressor cells in combination with primary mammary tumor resection reduces metastatic growth in the lungs
Source: PubMed Central journal article supplement (PMC6727565; doi:10.1186/s13058-019-1189-x), 2019-09-05
Supplement: 13058_2019_1189_MOESM11_ESM.pdf [file 13058_2019_1189_MOESM11_ESM.pdf]

# Supplemental Figure 10

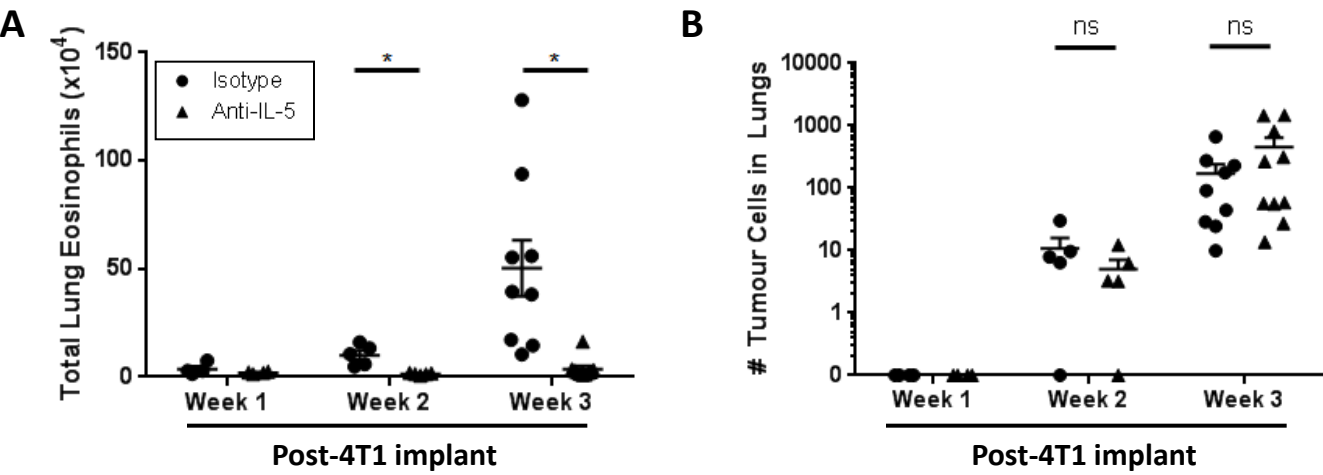

Supplemental Figure 11: **A**) Total number of lung eosinophils in 4T1 tumor-bearing mice treated with anti-IL5 antibody (clone TRFK5) or isotype control. **B**) Number of 4T1 cells in the lungs of mice implanted with orthotopic 4T1 tumors and treated with anti-IL5 antibody or isotype control.
