# Supplementary material for: Targeting myeloid-derived suppressor cells in combination with primary mammary tumor resection reduces metastatic growth in the lungs
Source: Springer Nature journal article supplement (doi:10.1186/s13058-019-1189-x), 2019-09-05
Supplement: MOESM4 [file 17142982]

# Supplemental Figure 3

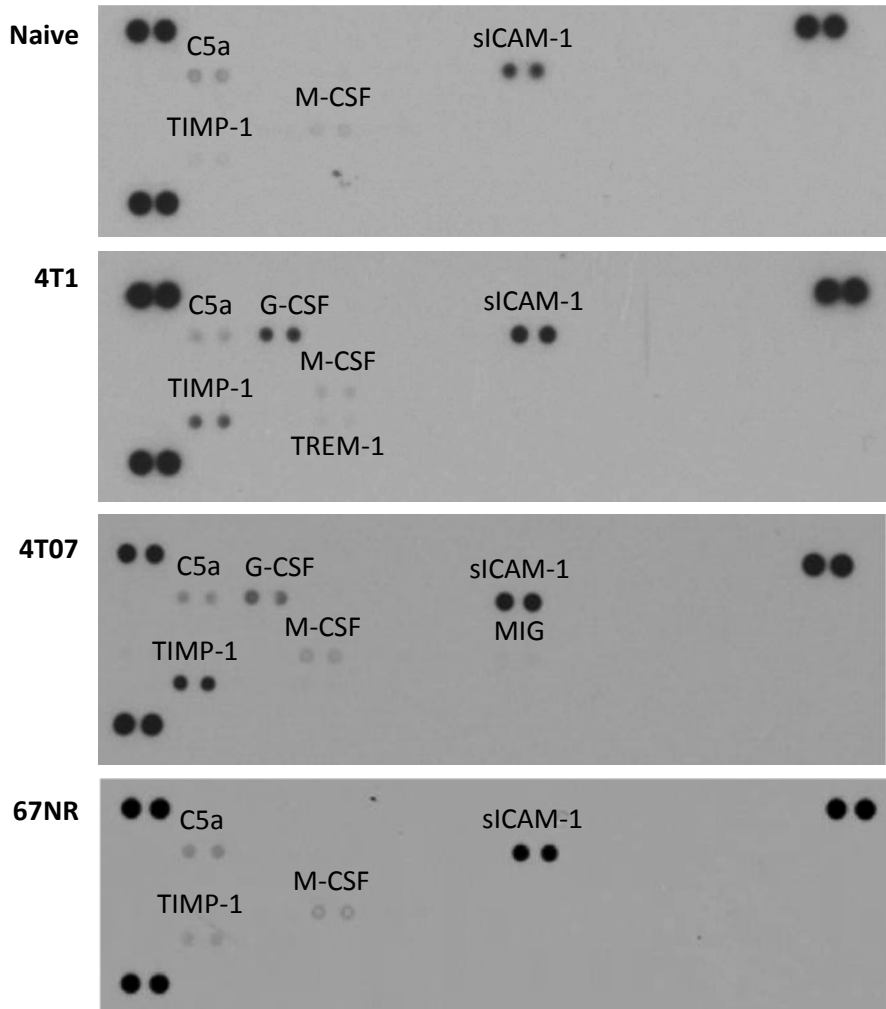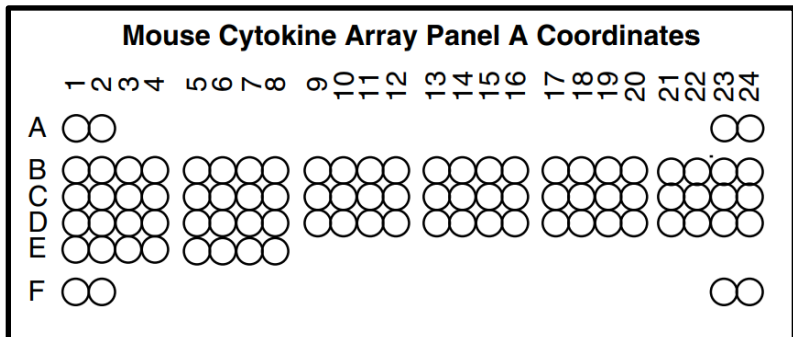

| Coordinate | Target/Control         |
|------------|------------------------|
| A1, A2     | Reference Spot         |
| A23, A24   | Reference Spot         |
| B1, B2     | BLC                    |
| B3, B4     | C5/C5a                 |
| B5, B6     | G-CSF                  |
| B7, B8     | GM-CSF                 |
| B9, B10    | I-309                  |
| B11, B12   | Eotaxin                |
| B13, B14   | sICAM-1                |
| B15, B16   | IFN-γ                  |
| B17, B18   | IL-1α                  |
| B19, B20   | IL-1β                  |
| B21, B22   | IL-1ra                 |
| B23, B24   | IL-2                   |
| C1, C2     | IL-3                   |
| C3, C4     | IL-4                   |
| C5, C6     | IL-5                   |
| C7, C8     | IL-6                   |
| C9, C10    | IL-7                   |
| C11, C12   | IL-10                  |
| C13, C14   | IL-13                  |
| C15, C16   | IL-12 p70              |
| C17, C18   | IL-16                  |
| C19, C20   | IL-17                  |
| C21, C22   | IL-23                  |
| C23, C24   | IL-27                  |
| D1, D2     | IP-10                  |
| D3, D4     | I-TAC                  |
| D5, D6     | KC                     |
| D7, D8     | M-CSF                  |
| D9, D10    | JE                     |
| D11, D12   | MCP-5                  |
| D13, D14   | MIG                    |
| D15, D16   | MIP-1α                 |
| D17, D18   | MIP-1β                 |
| D19, D20   | MIP-2                  |
| D21, D22   | RANTES                 |
| D23, D24   | SDF-1                  |
| E1, E2     | TARC                   |
| E3, E4     | TIMP-1                 |
| E5, E6     | TNF-α                  |
| E7, E8     | TREM-1                 |
| F1, F2     | Reference Spot         |
| F23, F24   | PBS (Negative Control) |

Supplemental Figure 3: Cytokine antibody array of plasma isolated from the peripheral blood of naïve mice or mice 3 weeks after implant of 4T1, 4T07, or 67NR tumours.
