# Supplementary material for: Targeting myeloid-derived suppressor cells in combination with primary mammary tumor resection reduces metastatic growth in the lungs
Source: Springer Nature journal article supplement (doi:10.1186/s13058-019-1189-x), 2019-09-05
Supplement: MOESM5 [file 17142982]

# Supplemental Figure 4

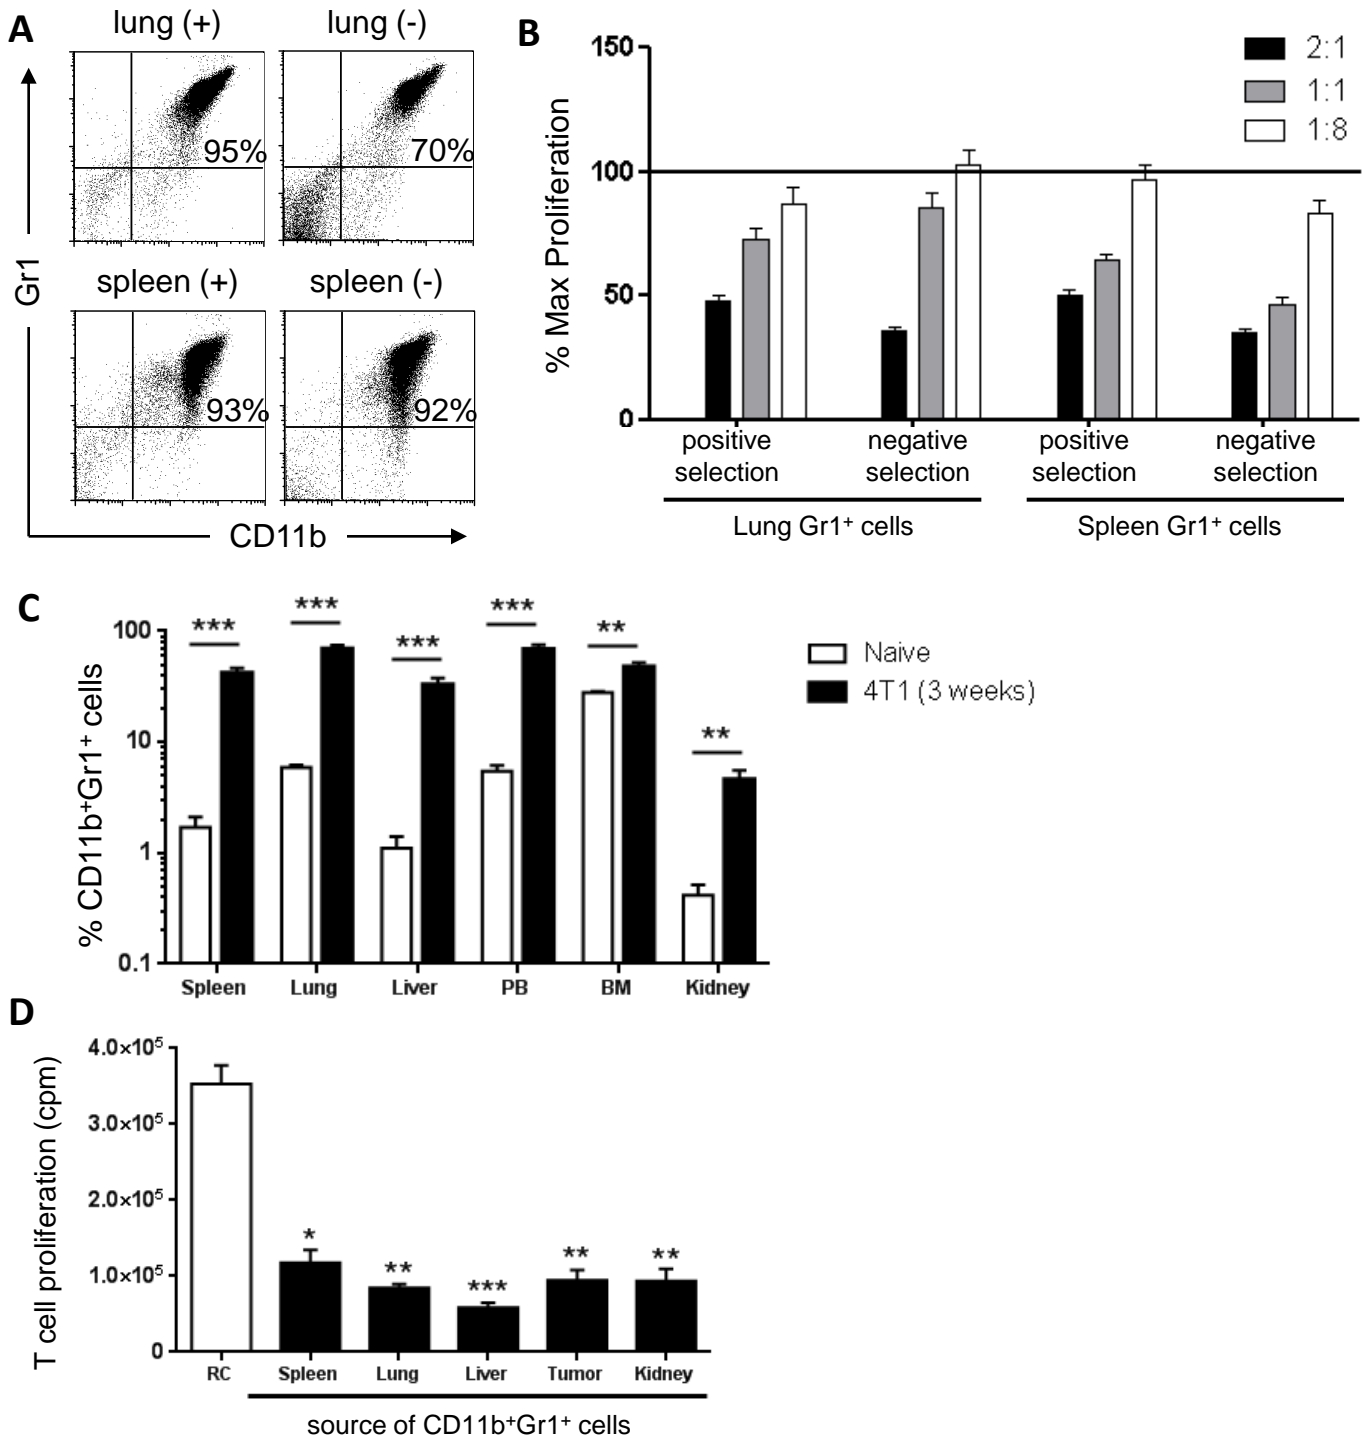

Supplemental Figure 4: **A**) % purity of CD11b<sup>+</sup>Gr1<sup>+</sup> cells isolated from lungs or spleen of 4T1-bearing mice by Gr1 positive selection (+) or negative selection (-) with antibodies against CD4, CD5, CD11c, CD45R/B220, CD49b, CD117, TER119, and F4/80. Analysis gates set based on single stained control samples. **B**) CD11b<sup>+</sup>Gr1<sup>+</sup> cells isolated by Gr1 positive selection are as immune suppressive as CD11b<sup>+</sup>Gr1<sup>+</sup> cells isolated by Gr1 negative selection, indicating the Gr1 antibody used in positive selection does not alter the immune suppressive function of the cells. **C**) Accumulation of CD11b<sup>+</sup>Gr1<sup>+</sup> cells in metastatic (lung, liver) and non-metastatic (spleen, peripheral blood, bone marrow, kidney) tissues 3 weeks post-4T1 implant. **D**) CD11b<sup>+</sup>Gr1<sup>+</sup> cells isolated from tissues 3 weeks after 4T1 primary tumor implant suppress T cell proliferation.
