# Supplementary material for: Targeting myeloid-derived suppressor cells in combination with primary mammary tumor resection reduces metastatic growth in the lungs
Source: Springer Nature journal article supplement (doi:10.1186/s13058-019-1189-x), 2019-09-05
Supplement: MOESM10 [file 17142982]

# Supplemental Figure 9

**A**

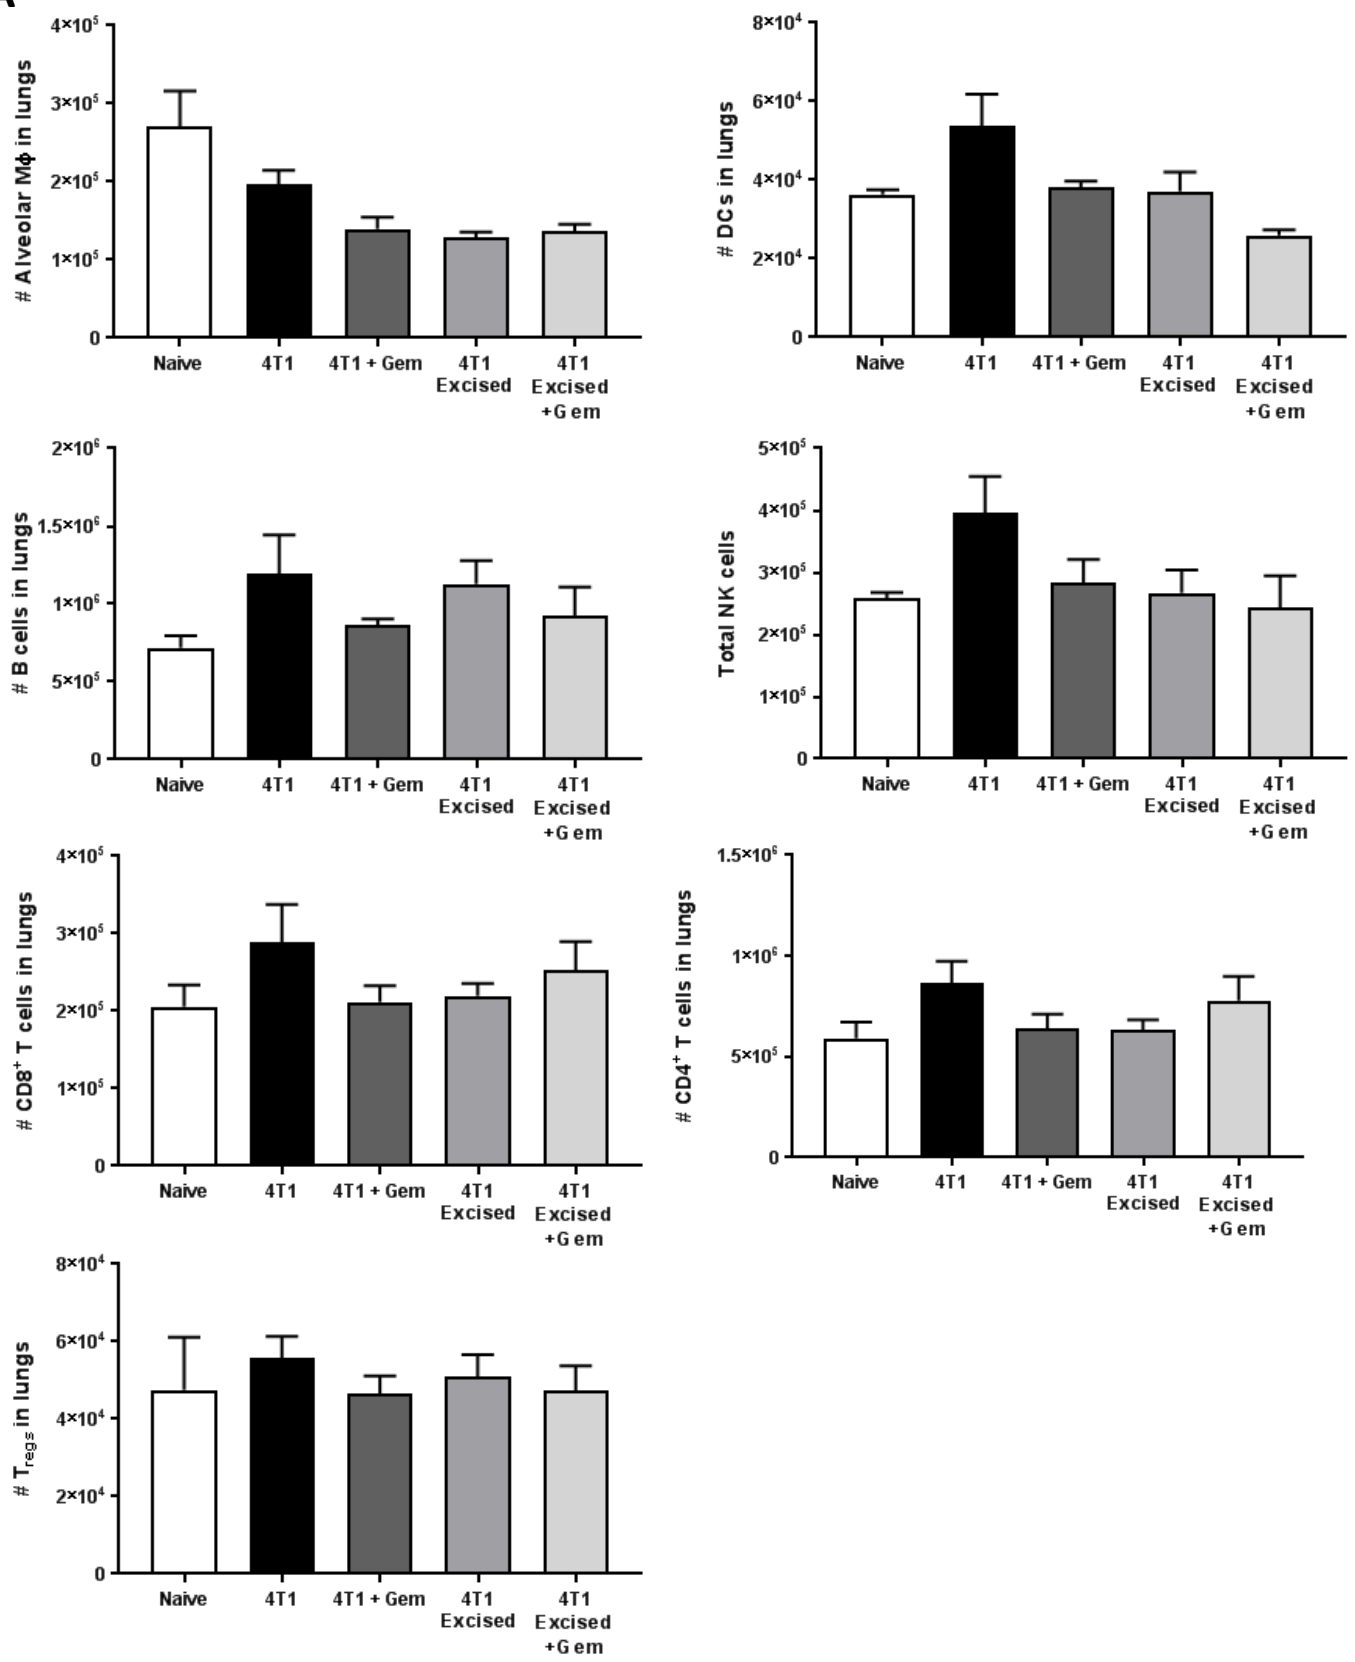

Supplemental Figure 10: **A**) Total number of lung dendritic cells (DCs), alveolar macrophages, B cells, NK cells, CD8 $^+$  T cells, CD4 $^+$  T cells, and T regulatory cells in mice from experiment outlined in Figure 5A-B.
