# Supplementary material for: Targeting myeloid-derived suppressor cells in combination with primary mammary tumor resection reduces metastatic growth in the lungs
Source: Springer Nature journal article supplement (doi:10.1186/s13058-019-1189-x), 2019-09-05
Supplement: MOESM12 [file 17142982]

# Supplemental Figure 11

**A**

Metastatic breast cancer orthotopic implant

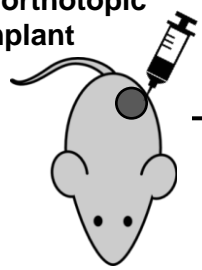

G-CSF

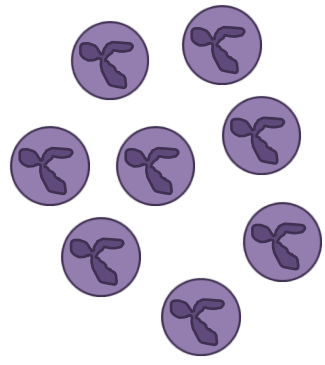

Systemic expansion of MDSCs

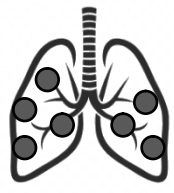

Lung metastatic burden

**B**

Surgical resection of orthotopic tumor

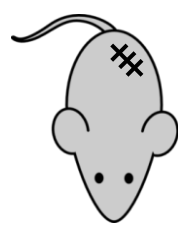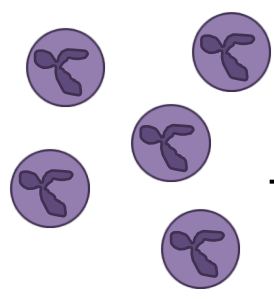

Residual pulmonary MDSCs

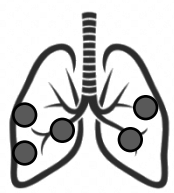

Lung metastatic burden

**C**

Surgical resection of orthotopic tumor

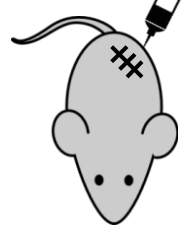

Gemcitabine

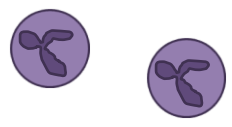

Depletion of pulmonary MDSCs

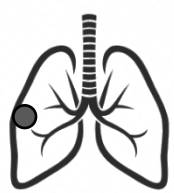

Lung metastatic burden

Supplemental Figure 12: Schematic of major findings **A)** Metastatic breast cancer cells secrete G-CSF, driving a systemic expansion of MDSCs and increased lung metastatic burden. **B)** Residual MDSCs continue to support lung metastatic colonization following surgical resection of orthotopic breast cancer tumors. **C)** Combination of surgical resection and low-dose gemcitabine treatment depletes pulmonary MDSCs and decreases lung metastatic burden.
